# Supplementary material
Source: publisher site journal article supplement (https://www.dovepress.com/article/615488)
Supplement: Supplementary file 1 [file 615488%20Table%20S1-S7.docx]

**Table S1 Strength of Instrumental Variables for Gut Microbiota**

| **Exposure** | **Instrumental Variables** | **F statistic** |
| --- | --- | --- |
| *genus Sutterella id.2896* | rs1145877 | 20.50374215 |
| *genus Sutterella id.2896* | rs11591622 | 20.67674778 |
| *genus Sutterella id.2896* | rs13173038 | 22.42445133 |
| *genus Sutterella id.2896* | rs143438747 | 22.56722917 |
| *genus Sutterella id.2896* | rs2050185 | 19.94684971 |
| *genus Sutterella id.2896* | rs2321387 | 22.67041526 |
| *genus Sutterella id.2896* | rs2613606 | 20.12136057 |
| *genus Sutterella id.2896* | rs62501473 | 21.58464247 |
| *genus Sutterella id.2896* | rs7499539 | 22.21495915 |
| *genus Sutterella id.2896* | rs7638039 | 20.1304372 |
| *genus Sutterella id.2896* | rs9350083 | 19.60616261 |
| *genus Marvinbryantia id.2005* | rs11620597 | 19.33601205 |
| *genus Marvinbryantia id.2005* | rs1187983 | 23.44629677 |
| *genus Marvinbryantia id.2005* | rs146541147 | 19.59946993 |
| *genus Marvinbryantia id.2005* | rs2724813 | 25.1759447 |
| *genus Marvinbryantia id.2005* | rs2842896 | 24.51499748 |
| *genus Marvinbryantia id.2005* | rs2863363 | 21.68438643 |
| *genus Marvinbryantia id.2005* | rs3125832 | 20.47394941 |
| *genus Marvinbryantia id.2005* | rs61884471 | 25.08055773 |
| *genus Marvinbryantia id.2005* | rs72948274 | 21.54214186 |
| *genus Marvinbryantia id.2005* | rs8006832 | 19.3136456 |
| *genus Escherichia Shigella id.3504* | rs112767262 | 20.07172219 |
| *genus Escherichia Shigella id.3504* | rs113127095 | 21.7937819 |
| *genus Escherichia Shigella id.3504* | rs113513883 | 20.50423904 |
| *genus Escherichia Shigella id.3504* | rs1154904 | 22.03945534 |
| *genus Escherichia Shigella id.3504* | rs118526 | 19.10449497 |
| *genus Escherichia Shigella id.3504* | rs2798105 | 20.6252697 |
| *genus Escherichia Shigella id.3504* | rs4731451 | 20.35853742 |
| *genus Escherichia Shigella id.3504* | rs57024273 | 20.02457253 |
| *genus Escherichia Shigella id.3504* | rs592299 | 20.89916006 |
| *genus Escherichia Shigella id.3504* | rs73208162 | 23.06230778 |
| *phylum Verrucomicrobia id.3982* | rs11252894 | 23.19949512 |
| *phylum Verrucomicrobia id.3982* | rs117107102 | 22.81853588 |
| *phylum Verrucomicrobia id.3982* | rs11729256 | 22.49139224 |
| *phylum Verrucomicrobia id.3982* | rs12512971 | 18.45766643 |
| *phylum Verrucomicrobia id.3982* | rs12908520 | 21.52091051 |
| *phylum Verrucomicrobia id.3982* | rs2602429 | 24.78231336 |
| *phylum Verrucomicrobia id.3982* | rs3995795 | 19.4273381 |
| *phylum Verrucomicrobia id.3982* | rs45598138 | 22.19753733 |
| *phylum Verrucomicrobia id.3982* | rs61779207 | 21.10524094 |
| *phylum Verrucomicrobia id.3982* | rs74542928 | 25.13963579 |
| *phylum Verrucomicrobia id.3982* | rs76430504 | 21.30950632 |
| *phylum Verrucomicrobia id.3982* | rs9349825 | 21.04491677 |
| *genus Allisonella id.2174* | rs1901739 | 21.66789336 |
| *genus Allisonella id.2174* | rs35110698 | 20.78446701 |
| *genus Allisonella id.2174* | rs35778461 | 24.34491219 |
| *genus Allisonella id.2174* | rs594561 | 19.87249125 |
| *genus Allisonella id.2174* | rs602075 | 32.35407491 |
| *genus Allisonella id.2174* | rs6742198 | 22.19628878 |
| *genus Allisonella id.2174* | rs76904847 | 19.66068842 |
| *genus Allisonella id.2174* | rs7898615 | 20.20189916 |
| *genus Eubacterium coprostanoligenes group id.11375* | rs1020520 | 19.74482315 |
| *genus Eubacterium coprostanoligenes group id.11375* | rs10444197 | 19.87455079 |
| *genus Eubacterium coprostanoligenes group id.11375* | rs11052069 | 19.63334369 |
| *genus Eubacterium coprostanoligenes group id.11375* | rs11720857 | 19.05699219 |
| *genus Eubacterium coprostanoligenes group id.11375* | rs12906958 | 21.14640478 |
| *genus Eubacterium coprostanoligenes group id.11375* | rs17159861 | 32.64990366 |
| *genus Eubacterium coprostanoligenes group id.11375* | rs2644213 | 19.74938256 |
| *genus Eubacterium coprostanoligenes group id.11375* | rs4076415 | 21.81288408 |
| *genus Eubacterium coprostanoligenes group id.11375* | rs62024432 | 19.99960658 |
| *genus Eubacterium coprostanoligenes group id.11375* | rs6762473 | 21.54926314 |
| *genus Eubacterium coprostanoligenes group id.11375* | rs76898927 | 21.33736625 |
| *genus Eubacterium coprostanoligenes group id.11375* | rs79895140 | 20.62079484 |
| *genus Eubacterium coprostanoligenes group id.11375* | rs9648214 | 25.43535217 |
| *family Rhodospirillaceae id.2717* | rs1035406 | 20.47970592 |
| *family Rhodospirillaceae id.2717* | rs11591293 | 21.91818682 |
| *family Rhodospirillaceae id.2717* | rs13336560 | 19.70454815 |
| *family Rhodospirillaceae id.2717* | rs1549633 | 20.88617606 |
| *family Rhodospirillaceae id.2717* | rs1923415 | 19.31691173 |
| *family Rhodospirillaceae id.2717* | rs3754624 | 23.56927629 |
| *family Rhodospirillaceae id.2717* | rs4278423 | 20.80367485 |
| *family Rhodospirillaceae id.2717* | rs55876211 | 21.55178722 |
| *family Rhodospirillaceae id.2717* | rs61933850 | 20.8769671 |
| *family Rhodospirillaceae id.2717* | rs6679026 | 19.88639234 |
| *family Rhodospirillaceae id.2717* | rs7001029 | 20.16580112 |
| *family Rhodospirillaceae id.2717* | rs72714493 | 20.40967434 |
| *family Rhodospirillaceae id.2717* | rs74354280 | 19.80044501 |
| *family Rhodospirillaceae id.2717* | rs76784716 | 22.66027449 |
| *family Rhodospirillaceae id.2717* | rs9813022 | 26.51564312 |
| *order Rhodospirillales id.2667* | rs1035406 | 21.39603004 |
| *order Rhodospirillales id.2667* | rs11591293 | 20.87112882 |
| *order Rhodospirillales id.2667* | rs11630875 | 21.85976867 |
| *order Rhodospirillales id.2667* | rs13336560 | 19.59273356 |
| *order Rhodospirillales id.2667* | rs1549633 | 21.157661 |
| *order Rhodospirillales id.2667* | rs3730086 | 20.04624262 |
| *order Rhodospirillales id.2667* | rs3754624 | 22.50611498 |
| *order Rhodospirillales id.2667* | rs4278423 | 20.25110107 |
| *order Rhodospirillales id.2667* | rs55876211 | 19.63309128 |
| *order Rhodospirillales id.2667* | rs61933850 | 20.88188772 |
| *order Rhodospirillales id.2667* | rs7001029 | 21.39173818 |
| *order Rhodospirillales id.2667* | rs76784716 | 22.87552245 |
| *order Rhodospirillales id.2667* | rs77304857 | 20.15175468 |
| *order Rhodospirillales id.2667* | rs9813022 | 26.08695671 |
| *genus Bifidobacterium id.436* | rs12022129 | 19.86934747 |
| *genus Bifidobacterium id.436* | rs182549 | 88.41802126 |
| *genus Bifidobacterium id.436* | rs2491158 | 19.87660722 |
| *genus Bifidobacterium id.436* | rs2686790 | 20.06211734 |
| *genus Bifidobacterium id.436* | rs540489 | 21.11797185 |
| *genus Bifidobacterium id.436* | rs55888705 | 20.33615913 |
| *genus Bifidobacterium id.436* | rs56108664 | 21.36200972 |
| *genus Bifidobacterium id.436* | rs5746486 | 19.70075572 |
| *genus Bifidobacterium id.436* | rs62181700 | 22.66224344 |
| *genus Bifidobacterium id.436* | rs7322849 | 31.03109097 |
| *genus Bifidobacterium id.436* | rs75344046 | 21.07710262 |
| *genus Bifidobacterium id.436* | rs857444 | 21.20465541 |
| *genus Ruminococcaceae UCG011 id.11368* | rs10274562 | 20.55909469 |
| *genus Ruminococcaceae UCG011 id.11368* | rs12636310 | 22.13390243 |
| *genus Ruminococcaceae UCG011 id.11368* | rs12724320 | 23.51130161 |
| *genus Ruminococcaceae UCG011 id.11368* | rs1416041 | 28.76228275 |
| *genus Ruminococcaceae UCG011 id.11368* | rs2729556 | 21.78076187 |
| *genus Ruminococcaceae UCG011 id.11368* | rs4490371 | 20.16049401 |
| *genus Ruminococcaceae UCG011 id.11368* | rs79113084 | 22.95364651 |
| *genus Ruminococcaceae UCG011 id.11368* | rs9729514 | 21.95037492 |
| *genus Prevotella9 id.11183* | rs111509883 | 24.22763017 |
| *genus Prevotella9 id.11183* | rs11685699 | 22.85250522 |
| *genus Prevotella9 id.11183* | rs117271932 | 22.31711168 |
| *genus Prevotella9 id.11183* | rs12648235 | 19.56126499 |
| *genus Prevotella9 id.11183* | rs1304512 | 21.07386477 |
| *genus Prevotella9 id.11183* | rs2104588 | 19.71168656 |
| *genus Prevotella9 id.11183* | rs2495052 | 19.80083521 |
| *genus Prevotella9 id.11183* | rs2683313 | 22.83855426 |
| *genus Prevotella9 id.11183* | rs4968431 | 19.71175599 |
| *genus Prevotella9 id.11183* | rs7237249 | 20.45396435 |
| *genus Prevotella9 id.11183* | rs72815774 | 20.08424213 |
| *genus Prevotella9 id.11183* | rs746764 | 22.45256181 |
| *genus Prevotella9 id.11183* | rs7976209 | 19.34749793 |
| *genus Prevotella9 id.11183* | rs9428102 | 19.56391156 |
| *genus Prevotella9 id.11183* | rs9613013 | 20.48878803 |

**Table S2 Reverse MR Analysis of the Causal Effect of IVDD on Gut Microbiota Abundance**

| **Bacteria taxa**  **(outcome)** | **No. of SNP** | **MR method** | **β** | **OR**  **（95%CI）** | **p-value** |
| --- | --- | --- | --- | --- | --- |
| *genus Sutterella id.2896* | 17 | IVW | -0.000566051 | 1.00 (0.90-1.11) | 0.991709457 |
| Weighted median | 0.031453938 | 1.03 (0.89-1.19) | 0.673263069 |
| MR Egger | -0.210888542 | 0.81 (0.45-1.46) | 0.495938209 |
| Weighted mode | 0.060478331 | 1.06 (0.83-1.36) | 0.634461192 |
| Simple mode | 0.049621851 | 1.05 (0.81-1.36) | 0.709813848 |
| *genus Marvinbryantia id.2005* | 17 | IVW | -0.00084859 | 1.00 (0.89-1.12) | 0.988174382 |
| Weighted median | 0.037143425 | 1.04 (0.89-1.20) | 0.623547795 |
| MR Egger | 0.33972892 | 1.40 (0.75-2.62) | 0.301846672 |
| Weighted mode | 0.050389754 | 1.05 (0.81-1.37) | 0.713412816 |
| Simple mode | 0.033784219 | 1.03 (0.78-1.37) | 0.815231982 |
| *genus Escherichia Shigella id.3504* | 17 | IVW | 0.045263725 | 1.05 (0.94-1.17) | 0.429745801 |
| Weighted median | 0.047012982 | 1.05 (0.91-1.21) | 0.526764144 |
| MR Egger | -0.007801505 | 0.99 (0.53-1.85) | 0.980782636 |
| Weighted mode | 0.009956885 | 1.01 (0.80-1.27) | 0.934253244 |
| Simple mode | 0.050552091 | 1.05 (0.82-1.35) | 0.700270669 |
| *phylum Verrucomicrobia id.3982* | 17 | IVW | -0.052067923 | 0.95 (0.85-1.06) | 0.354050291 |
| Weighted median | -0.071156285 | 0.93 (0.80-1.08) | 0.355128723 |
| MR Egger | -0.651634257 | 0.52 (0.28-0.96) | 0.053557223 |
| Weighted mode | -0.067462289 | 0.93 (0.70-1.24) | 0.645805479 |
| Simple mode | -0.067462289 | 0.93 (0.71-1.23) | 0.64127247 |
| *genus Allisonella id.2174* | 13 | IVW | -0.10122622 | 0.90 (0.70- 1.16) | 0.434590155 |
| Weighted median | -0.266662562 | 0.77 (0.54- 1.10) | 0.14460048 |
| MR Egger | 1.299587131 | 3.67 (0.20-67.94) | 0.401518165 |
| Weighted mode | -0.297044559 | 0.74 (0.38- 1.46) | 0.403754193 |
| Simple mode | -0.315781653 | 0.73 (0.36- 1.46) | 0.388988576 |
| *genus Eubacterium coprostanoligenes group id.11375* | 17 | IVW | -0.017049817 | 0.98 (0.90-1.08) | 0.719912358 |
| Weighted median | -0.063132775 | 0.94 (0.83-1.06) | 0.311608445 |
| MR Egger | -0.102506594 | 0.90 (0.54-1.51) | 0.702888977 |
| Weighted mode | -0.087968172 | 0.92 (0.74-1.14) | 0.436717677 |
| Simple mode | -0.080704183 | 0.92 (0.74-1.14) | 0.471112515 |
| *family Rhodospirillaceae id.2717* | 16 | IVW | -0.008190223 | 0.99 (0.86-1.14) | 0.907483798 |
| Weighted median | 0.02569267 | 1.03 (0.85-1.24) | 0.794336591 |
| MR Egger | 0.828845662 | 2.29 (1.08-4.84) | 0.047733877 |
| Weighted mode | 0.09745018 | 1.10 (0.80-1.52) | 0.560948606 |
| Simple mode | 0.081667247 | 1.09 (0.78-1.51) | 0.633668908 |
| *order Rhodospirillales id.2667* | 16 | IVW | -0.014785444 | 0.99 (0.86-1.13) | 0.833063549 |
| Weighted median | 0.018631687 | 1.02 (0.84-1.23) | 0.847730741 |
| MR Egger | 0.777886194 | 2.18 (1.01-4.70) | 0.067815524 |
| Weighted mode | 0.072581481 | 1.08 (0.79-1.46) | 0.651069878 |
| Simple mode | 0.052865421 | 1.05 (0.77-1.45) | 0.750438488 |
| *genus Bifidobacterium id.436* | 17 | IVW | 0.004516407 | 1.00 (0.91-1.11) | 0.930267602 |
| Weighted median | 0.016714397 | 1.02 (0.88-1.17) | 0.81421721 |
| MR Egger | -0.319737347 | 0.73 (0.41-1.27) | 0.281575805 |
| Weighted mode | 0.029688689 | 1.03 (0.81-1.31) | 0.811853903 |
| Simple mode | 0.040264024 | 1.04 (0.81-1.33) | 0.753478704 |
| *genus Ruminococcaceae UCG011 id.11368* | 17 | IVW | 0.075087549 | 1.08 (0.88-1.32) | 0.467083613 |
| Weighted median | 0.067711608 | 1.07 (0.82-1.40) | 0.621121222 |
| MR Egger | 0.707918047 | 2.03 (0.66-6.21) | 0.233426382 |
| Weighted mode | 0.093558267 | 1.10 (0.71-1.69) | 0.677328009 |
| Simple mode | 0.082319288 | 1.09 (0.69-1.72) | 0.729768149 |
| *genus Prevotella9 id.11183* | 17 | IVW | 0.03226418 | 1.03 (0.91-1.17) | 0.603219928 |
| Weighted median | 0.026969537 | 1.03 (0.87-1.21) | 0.745442696 |
| MR Egger | 0.198628321 | 1.22 (0.62-2.40) | 0.573113224 |
| Weighted mode | 0.009993657 | 1.01 (0.75-1.36) | 0.948812559 |
| Simple mode | 0.021316468 | 1.02 (0.74-1.41) | 0.898473565 |

No. of SNP is the number of SNPs being used as IVs.Significant p-value was marked in bold.

MR, Mendelian randomization; SNP, single-nucleotide polymorphism; IVW, inverse-variance weighted; OR, odds ratio; CI, confidence interval.

**Table S3 Heterogeneity Tests for MR Analyses of Gut Microbiota on IVDD**

| **Exposure** | **id.exposure** | **Q_df_Inverse.variance.weighted** | **Q_pval_MR.Egger** | **Q_pval_Inverse.variance.weighted** |
| --- | --- | --- | --- | --- |
| Gut microbiota abundance (genus Eubacterium coprostanoligenes group id.11375) | ebi-a-GCST90016997 | 12 | 0.634519886 | 0.639516511 |
| Gut microbiota abundance (genus Sutterella id.2896) | ebi-a-GCST90017072 | 10 | 0.488095728 | 0.583265864 |
| Gut microbiota abundance (genus Marvinbryantia id.2005) | ebi-a-GCST90017032 | 9 | 0.127068396 | 0.138543383 |
| Gut microbiota abundance (family Rhodospirillaceae id.2717) | ebi-a-GCST90016949 | 14 | 0.405679495 | 0.305740711 |
| Gut microbiota abundance (order Rhodospirillales id.2667) | ebi-a-GCST90017106 | 13 | 0.7133195 | 0.650061275 |
| Gut microbiota abundance (genus Bifidobacterium id.436) | ebi-a-GCST90016970 | 11 | 0.15481783 | 0.180187571 |
| Gut microbiota abundance (genus Escherichia Shigella id.3504) | ebi-a-GCST90016995 | 9 | 0.724070802 | 0.803578541 |
| Gut microbiota abundance (genus Ruminococcaceae UCG011 id.11368) | ebi-a-GCST90017059 | 7 | 0.181393305 | 0.244457396 |
| Gut microbiota abundance (phylum Verrucomicrobia id.3982) | ebi-a-GCST90017118 | 11 | 0.474496074 | 0.551053615 |
| Gut microbiota abundance (genus Allisonella id.2174) | ebi-a-GCST90016963 | 7 | 0.165346753 | 0.102110871 |
| Gut microbiota abundance (genus Prevotella9 id.11183) | ebi-a-GCST90017045 | 14 | 0.668240096 | 0.719576066 |

**Table S4 Assessment of Horizontal Pleiotropy for MR Analyses of Gut Microbiota on IVDD**

| **Exposure** | **id.exposure** | **pval_MR presso** |
| --- | --- | --- |
| Gut microbiota abundance (genus Eubacterium coprostanoligenes group id.11375) | ebi-a-GCST90016997 | 0.049397194 |
| Gut microbiota abundance (genus Sutterella id.2896) | ebi-a-GCST90017072 | 0.052878511 |
| Gut microbiota abundance (genus Marvinbryantia id.2005) | ebi-a-GCST90017032 | 0.048145453 |
| Gut microbiota abundance (family Rhodospirillaceae id.2717) | ebi-a-GCST90016949 | 0.046639038 |
| Gut microbiota abundance (order Rhodospirillales id.2667) | ebi-a-GCST90017106 | 0.000777904 |
| Gut microbiota abundance (genus Bifidobacterium id.436) | ebi-a-GCST90016970 | 0.075058837 |
| Gut microbiota abundance (genus Escherichia Shigella id.3504) | ebi-a-GCST90016995 | 0.069746664 |
| Gut microbiota abundance (genus Ruminococcaceae UCG011 id.11368) | ebi-a-GCST90017059 | 0.027202135 |
| Gut microbiota abundance (phylum Verrucomicrobia id.3982) | ebi-a-GCST90017118 | 0.001152044 |

**Table S5 Strength of Instrumental Variables for Inflammatory Cytokines**

| **Exposure** | **Instrumental Variables** | **F statistic** |
| --- | --- | --- |
| IFN_G | rs10481651 | 22.27489412 |
| IFN_G | rs10761731 | 23.69386917 |
| IFN_G | rs115729819 | 23.85915313 |
| IFN_G | rs11843756 | 21.47092273 |
| IFN_G | rs12420286 | 22.21605764 |
| IFN_G | rs2073438 | 23.94130356 |
| IFN_G | rs2188420 | 24.99354422 |
| IFN_G | rs60059008 | 23.42834933 |
| IFN_G | rs74148555 | 23.97835864 |
| IFN_G | rs78296352 | 27.66045536 |
| IL_1B | rs115242021 | 25.53017837 |
| IL_1B | rs143319329 | 21.9356097 |
| IL_1B | rs61335305 | 21.78822809 |
| IL_1B | rs62015704 | 23.03655413 |
| RANTES | rs112072646 | 23.99495709 |
| RANTES | rs147509526 | 24.74846445 |
| RANTES | rs2251660 | 26.43778987 |
| RANTES | rs2731672 | 20.83789462 |
| RANTES | rs62438851 | 21.24135605 |
| RANTES | rs7000423 | 27.17303215 |
| RANTES | rs7170339 | 22.43405301 |
| RANTES | rs72793342 | 24.01843481 |
| RANTES | rs9675798 | 21.88361727 |
| MIP_1B | rs113010081 | 603.6391313 |
| MIP_1B | rs113877493 | 782.2635389 |
| MIP_1B | rs116237296 | 22.45282839 |
| MIP_1B | rs117453826 | 99.87439323 |
| MIP_1B | rs117657747 | 21.25895334 |
| MIP_1B | rs141102180 | 70.7659502 |
| MIP_1B | rs1437220 | 20.8059525 |
| MIP_1B | rs1564708 | 82.33332327 |
| MIP_1B | rs17138331 | 23.623783 |
| MIP_1B | rs2411161 | 22.17487592 |
| MIP_1B | rs281748 | 21.55479804 |
| MIP_1B | rs3760440 | 58.76359224 |
| MIP_1B | rs5743614 | 23.09239294 |
| MIP_1B | rs6908843 | 22.75060333 |
| MIP_1B | rs72791296 | 25.72872618 |
| MIP_1B | rs72799710 | 22.83143555 |
| MIP_1B | rs76356863 | 26.84052298 |
| MIP_1B | rs76582507 | 23.23648876 |
| MIP_1B | rs76776296 | 27.38933457 |
| MIP_1B | rs79068918 | 97.33732301 |
| MIG | rs111607343 | 21.87458868 |
| MIG | rs11177248 | 22.39052065 |
| MIG | rs112861654 | 25.88588474 |
| MIG | rs117831247 | 25.97246534 |
| MIG | rs139010077 | 21.14083591 |
| MIG | rs55876513 | 41.56493045 |
| MIG | rs62562991 | 24.54399239 |
| MIG | rs6679677 | 24.77307927 |
| MIG | rs77086208 | 22.18928258 |
| MIG | rs816960 | 23.72267039 |
| IL_18 | rs10414578 | 27.40403351 |
| IL_18 | rs116383510 | 26.4513402 |
| IL_18 | rs117266781 | 24.09662031 |
| IL_18 | rs12420140 | 90.16450936 |
| IL_18 | rs143370787 | 27.2620356 |
| IL_18 | rs17229943 | 44.1137792 |
| IL_18 | rs1979967 | 24.11736945 |
| IL_18 | rs4482818 | 25.73221616 |
| IL_18 | rs610473 | 27.69948592 |
| IL_18 | rs78623212 | 24.64171778 |
| IL_18 | rs78716465 | 21.82549894 |
| SDF_1A | rs10013755 | 27.17958455 |
| SDF_1A | rs149893336 | 20.83955385 |
| SDF_1A | rs1600396 | 20.91182777 |
| SDF_1A | rs3988298 | 22.53888712 |
| SDF_1A | rs62194947 | 21.20434069 |
| SDF_1A | rs78883416 | 22.8972104 |

**Table S6 Heterogeneity Tests for MR Analyses of Inflammatory Cytokines on IVDD**

| **Exposure** | **Q_df_Inverse.variance.weighted** | **Q_pval_MR.Egger** | **Q_pval_Inverse.variance.weighted** |
| --- | --- | --- | --- |
| meta_filt_IFN_G_noBMI | 9 | 0.157176421 | 0.183754281 |
| meta_filt_IL_1B_noBMI | 3 | 0.567121342 | 0.613169619 |
| meta_filt_RANTES_noBMI | 8 | 0.19916696 | 0.23527727 |
| meta_filt_MIP_1B_noBMI | 19 | 0.82903654 | 0.867199543 |
| meta_filt_MIG_noBMI | 9 | 0.983135831 | 0.971368036 |
| meta_filt_IL_18_noBMI | 10 | 0.251732383 | 0.325188606 |
| meta_filt_SDF_1A_noBMI | 5 | 0.690616628 | 0.63332278 |

**Table S7 Assessment of Horizontal Pleiotropy for MR Analyses of Inflammatory Cytokines on IVDD**

| **Exposure** | **pval_MR presso** |
| --- | --- |
| meta_filt_IFN_G_noBMI | 0.235 |
| meta_filt_IL_1B_noBMI | 0.639333333 |
| meta_filt_RANTES_noBMI | 0.009 |
| meta_filt_MIP_1B_noBMI | 0.769333333 |
| meta_filt_MIG_noBMI | 0.975 |
| meta_filt_IL_18_noBMI | 0.045333333 |
| meta_filt_SDF_1A_noBMI | 0.638333333 |
